# Supplementary material for: A Genome-Wide Association Study of Field Resistance to Magnaporthe Oryzae in Rice
Source: Rice (N Y). 2016 Aug 30;9(1):44. doi: 10.1186/s12284-016-0116-3 (PMC5005242; doi:10.1186/s12284-016-0116-3)
Supplement: Additional file 3: Table S3. — Information on the 74 candidate blast resistant genes in LAFBRs. (XLSX 90 kb) [file 12284_2016_116_MOESM3_ESM.xlsx]

## Sheet: Sheet1
Supplementary Table 3. Information of 74 candidate genes identified in LAFBRs.
Genes	chr.	LAFBRs	Tracking_ID	Annotation
1	1	1	LOC_Os01g45570.1	homeobox associated leucine zipper, putative, expressed
2	1	4	LOC_Os01g51400.1	Leucine Rich Repeat family protein, expressed
3	1	1	LOC_Os01g45450.1	AAA family ATPase, putative, expressed
4	1	1	LOC_Os01g45530.1	single-stranded DNA-binding protein, putative, expressed
5	1	2	LOC_Os01g45910.1	plastidic ATP/ADP-transporter, putative, expressed
6	1	4	LOC_Os01g51380.1	ATP synthase, putative, expressed
7	1	5	LOC_Os01g55880.1	hemimethylated DNA binding domain containing protein
8	1	1	LOC_Os01g45730.1	zinc finger C-x8-C-x5-C-x3-H type family protein
9	1	3	LOC_Os01g49770.1	zinc finger, C3HC4 type domain containing protein, expressed
10	1	4	LOC_Os01g51260.1	MYB family transcription factor, putative, expressed
11	1	2	LOC_Os01g46020.1	TATA-binding protein-associated factor TAFII55 family protein, putative, expressed
12	1	2	LOC_Os01g45860.1	GRAS family transcription factor domain containing protein, expressed
13	1	2	LOC_Os01g46030.1	receptor-like protein kinase, putative
14	1	3	LOC_Os01g49614.1	Protein kinase domain containing protein, expressed
15	1	3	LOC_Os01g49580.1	Protein kinase domain containing protein, expressed
16	1	4	LOC_Os01g51200.1	CK1_CaseinKinase_1.3 - CK1 includes the casein kinase 1 kinases, expressed
17	1	4	LOC_Os01g51290.1	protein kinase family protein, putative, expressed
18	1	5	LOC_Os01g55890.1	amino acid kinase, putative, expressed
19	1	1	LOC_Os01g45620.1	CGMC_MAPKCMGC_2.5 - CGMC includes CDA, MAPK, GSK3, and CLKC kinases, expressed
20	1	1	LOC_Os01g45650.1	OsFBX19 - F-box domain containing protein
21	1	2	LOC_Os01g45900.1	OsFBX20 - F-box domain containing protein, expressed
22	1	3	LOC_Os01g49630.1	proteophosphoglycan ppg4, putative, expressed
23	1	4	LOC_Os01g51420.1	calcineurin B, putative, expressed
24	1	3	LOC_Os01g49690.1	Ser/Thr protein phosphatase family protein, putative, expressed
25	1	4	LOC_Os01g51320.1	peroxisomal N-acetyl-spermine/spermidine oxidase precursor, putative, expressed
26	1	3	LOC_Os01g49529.1	OsWAK10d - OsWAK receptor-like cytoplasmic kinase OsWAK-RLCK, expressed
27	1	5	LOC_Os01g55799.1	exo70 exocyst complex subunit domain containing protein, expressed
28	1	4	LOC_Os01g51300.1	WD domain, G-beta repeat domain containing protein, expressed
29	3	6	LOC_Os03g19960.1	ATP-dependent RNA helicase, putative, expressed
30	3	6	LOC_Os03g20100.1	S1 RNA binding domain containing protein, expressed
31	3	6	LOC_Os03g20090.1	MYB family transcription factor, putative, expressed
32	3	6	LOC_Os03g19890.1	NADH dehydrogenase 1 alpha subcomplex subunit 5, putative, expressed
33	4	7	LOC_Os04g52840.1	tyrosine protein kinase domain containing protein, putative, expressed
34	4	7	LOC_Os04g52830.1	OsFBK15 - F-box domain and kelch repeat containing protein, expressed
35	4	7	LOC_Os04g52940.1	SIT4 phosphatase-associated protein domain containing protein, expressed
36	5	8	LOC_Os05g05320.1	PPR repeat domain containing protein, putative, expressed
37	5	8	LOC_Os05g05280.1	zinc finger family protein, putative, expressed
38	5	8	LOC_Os05g05160.1	CGMC_MAPKCGMC_2.1 - CGMC includes CDA, MAPK, GSK3, and CLKC kinases, expressed
39	5	8	LOC_Os05g05270.1	sucrose-phosphatase, putative, expressed
40	5	8	LOC_Os05g05240.1	serine/threonine protein phosphatase, putative, expressed
41	5	8	LOC_Os05g05210.1	WD domain, G-beta repeat domain containing protein, expressed
42	8	10	LOC_Os08g34650.1	receptor-like protein kinase precursor, putative, expressed
43	8	10	LOC_Os08g34640.1	receptor-like protein kinase precursor, putative, expressed
44	8	10	LOC_Os08g34550.1	RING-H2 finger protein, putative, expressed
45	8	9	LOC_Os08g09210.1	phosphoribosylamine--glycine ligase, putative, expressed
46	8	10	LOC_Os08g34580.1	trehalose-6-phosphate synthase, putative, expressed
47	8	10	LOC_Os08g34720.1	D-3-phosphoglycerate dehydrogenase, chloroplast precursor, putative, expressed
48	9	11	LOC_Os09g27890.1	lysM domain-containing GPI-anchored protein precursor, putative, expressed
49	9	11	LOC_Os09g27850.1	transcription regulator, putative, expressed
50	9	11	LOC_Os09g28120.1	OsFBX330 - F-box domain containing protein, expressed
51	9	11	LOC_Os09g27820.1	1-aminocyclopropane-1-carboxylate oxidase protein, putative, expressed
52	9	11	LOC_Os09g27750.1	1-aminocyclopropane-1-carboxylate oxidase 1, putative, expressed
53	10	12	LOC_Os10g32600.1	MYB family transcription factor, putative
54	10	12	LOC_Os10g32760.1	zinc finger family protein, putative, expressed
55	10	12	LOC_Os10g32750.1	zinc finger family protein, putative
56	10	12	LOC_Os10g32830.1	kinase, pfkB family, putative
57	10	13	LOC_Os10g37280.1	diacylglycerol kinase, putative, expressed
58	10	13	LOC_Os10g37190.1	protein kinase domain containing protein, expressed
59	10	13	LOC_Os10g37330.1	oxidoreductase, aldo/keto reductase family protein, putative, expressed
60	10	13	LOC_Os10g37210.1	FAD dependent oxidoreductase domain containing protein, expressed
61	10	12	LOC_Os10g32710.1	WD domain, G-beta repeat domain containing protein, expressed
62	10	12	LOC_Os10g32770.1	WD repeat-containing protein, putative, expressed
63	10	13	LOC_Os10g37290.1	DEFL6 - Defensin and Defensin-like DEFL family, expressed
64	11	14	LOC_Os11g08445.1	DnaK family protein, putative
65	11	14	LOC_Os11g08440.1	DnaK family protein, putative, expressed
66	11	14	LOC_Os11g08460.1	DnaK family protein, putative, expressed
67	11	14	LOC_Os11g08470.1	DnaK family protein, putative
68	11	14	LOC_Os11g08410.1	GATA zinc finger domain containing protein
69	11	15	LOC_Os11g40780.1	disease resistance protein, putative
70	12	16	LOC_Os12g40419.1	protein kinase domain containing protein, expressed
71	12	16	LOC_Os12g40320.1	OsFBX459 - F-box domain containing protein, expressed
72	12	16	LOC_Os12g40310.1	OsFBX458 - F-box domain containing protein
73	12	16	LOC_Os12g40360.1	OsFBX460 - F-box domain containing protein, expressed
74	12	16	LOC_Os12g40370.1	OsFBX461 - F-box domain containing protein
