# Supplementary material for: A Genome-Wide Association Study of Field Resistance to Magnaporthe Oryzae in Rice
Source: Rice (N Y). 2016 Aug 30;9(1):44. doi: 10.1186/s12284-016-0116-3 (PMC5005242; doi:10.1186/s12284-016-0116-3)
Supplement: Additional file 6: Table S6. — The SNP haplotypes of the 20 highly resistant cultivars in the 16 LAFBRs. (XLSX 22 kb) [file 12284_2016_116_MOESM6_ESM.xlsx]

## Sheet: Sheet1
Supplementary Table 6. The SNP haplotypes of the 20 highly resistant cultivars in the 16 LAFBRs.
Cultivars	LAFBR_1	LAFBR_2	LAFBR_3	LAFBR_4	LAFBR_5	LAFBR_6	LAFBR_7	LAFBR_8	LAFBR_9	LAFBR_10	LAFBR_11	LAFBR_12	LAFBR_13	LAFBR_14	LAFBR_15	LAFBR_16	R type allele Frequency(%)
301042																		87.5
Dom-sufid
301052																		18.75
Geumobyeo
301066																		93.75
IRAT 177
301068																		87.5
Jambu
301091																		93.75
LAC 23
301108																		100
NSF-TV 116
301158																		87.5
B6616A4-22-Bk-5-4
301163																		93.75
Zhenshan 2
301186																		100
IRAT 13
301229																		100
WAB 502-13-4-1
301284																		93.75
SL 22-613
301298																		93.75
Llanero 501
301299																		100
Manzano
301300																		93.75
R 101
301313																		81.25
DNJ 140
301330																		100
Berenj
301378																		100
OS 6 (WC 10296)
301379																		93.75
Cocodrie
301411																		93.75
Saber
301420																		93.75
C101A51

## Sheet: Sheet2
Supplementary Table 6. The SNP haplotypes of the 20 highly resistant cultivars in the 16 LAFBRs.
Cultivars	LAFBR_1	LAFBR_2	LAFBR_3	LAFBR_4	LAFBR_5	LAFBR_6	LAFBR_7	LAFBR_8	LAFBR_9	LAFBR_10	LAFBR_11	LAFBR_12	LAFBR_13	LAFBR_14	LAFBR_15	LAFBR_16	R type allele Frequency(%)
301042-Dom-sufid	T	T	A	G	T	G	G	C	G	G	T	G	Na	G	C	C	87.5
301052---Geumobyeo	C	G	T	A	T	T	G	A	A	A	G	C	A	G	C	T	18.75
301066--IRAT 177	T	Na	A	G	T	G	C	C	G	G	T	G	C	G	C	C	93.75
301068--Jambu	T	T	A	G	T	G	C	C	G	G	G	C	C	G	C	C	87.5
301091--LAC 23	T	Na	A	G	T	G	C	C	G	G	T	G	C	G	C	C	93.75
301108--NSF-TV 116	T	T	A	G	T	G	C	C	G	G	T	G	C	G	C	C	100
301158--B6616A4-22-Bk-5-4	T	T	A	G	Na	G	C	C	A	G	T	G	C	G	C	C	87.5
301163--Zhenshan 2	T	T	A	G	G	G	C	C	G	G	T	G	C	G	C	C	93.75
301186--IRAT 13	T	T	A	G	T	G	C	C	G	G	T	G	C	G	C	C	100
301229--WAB 502-13-4-1	T	T	A	G	T	G	C	C	G	G	T	G	C	G	C	C	100
301284--SL 22-613	T	T	A	G	G	G	C	C	G	G	T	G	C	G	C	C	93.75
301298--Llanero 501	T	T	A	G	Na	G	C	C	G	G	T	G	C	G	C	C	93.75
301299--Manzano	T	T	A	G	T	G	C	C	G	G	T	G	C	G	C	C	100
301300--R 101	T	Na	A	G	T	G	C	C	G	G	T	G	C	G	C	C	93.75
301313--DNJ 140	T	T	A	G	T	Na	C	C	G	G	T	G	Na	A	C	C	81.25
301330--Berenj	T	T	A	G	T	G	C	C	G	G	T	G	C	G	C	C	100
301378--OS 6 (WC 10296)	T	T	A	G	T	G	C	C	G	G	T	G	C	G	C	C	100
301379--Cocodrie	T	T	A	G	Na	G	C	C	G	G	T	G	C	G	C	C	93.75
301411--Saber	T	T	A	G	G	G	C	C	G	G	T	G	C	G	C	C	93.75
301420--C101A51	T	T	A	G	T	G	C	C	G	G	T	G	C	A	C	C	93.75
